1 **Sexual selection affects the evolution of contact pheromones**  
2 **in *Drosophila melanogaster* populations isolated by**  
3 **differential sexual conflict**

4  
5 ROCHISHNU DUTTA<sup>1\*</sup>, TEJINDER SINGH CHECHI<sup>1</sup>, NAGARAJ GURU  
6 PRASAD<sup>1</sup>

7 <sup>1</sup>*Department of Biological Sciences, Indian Institute of Science Education and Research,*  
8 *Mohali, India*

9 \*Corresponding author. E-mail: [rochishnudutta@gmail.com](mailto:rochishnudutta@gmail.com) (RD)

10 ORCID for RD: 0000-0003-2216-2505

11 Author Contribution: R.D. and N.G.P. designed research; R.D. and T.J. performed specimen  
12 collection and CHC extraction; R.D. performed gas chromatography and analyzed data; and  
13 R.D. wrote the paper; N.G.P. corrected draft manuscript.

14 Acknowledgement: We thank all the members of Evolutionary Biology Laboratory at Indian  
15 Institute of Science Education and Research, Mohali for their numerous small but essential  
16 assistance during this study.

17 Data Archive: Data has been added as a supplementary material. There is no other data to be  
18 archived.

19 Author Declaration: The authors declare no conflict of interest.

20 **Abstract** - The ability of sexual conflict to facilitate reproductive isolation is widely  
21 anticipated. However, very few experimental evolutionary studies have convincingly  
22 demonstrated the evolution of reproductive isolation due to sexual conflict. Recently a study  
23 on the replicates of *Drosophila melanogaster* populations under differential sexual conflict  
24 found that divergent mate preference evolved among replicates under high sexual conflict  
25 regime. The precopulatory isolating mechanism underlying such divergent mate preference  
26 could be sexual signals such as cuticular lipids since they evolve rapidly and are involved in  
27 *D. melanogaster* mate recognition. Using *Drosophila melanogaster* replicates used in the  
28 previous study, we investigate whether cuticular lipid divergence bears signatures of sexually  
29 antagonistic coevolution that led to reproductive isolation among replicates of high sexual  
30 conflict regime. We found that their cuticular lipid profiles are sexually dimorphic. Although  
31 replicates with male biased sex ratio evolved isolation in reproductive traits due to high sexual  
32 conflict, the patterns of cuticular lipid divergence in high and low sexual conflict regimes  
33 suggest that sexual selection is the dominant selection pressure rather than sexual conflict  
34 affecting the cuticular lipid profile. We also find cuticular lipid divergence patterns to be  
35 suggestive of the Buridan's Ass regime which is one of the six possible mechanism to resolve  
36 sexual conflict. Although both sexes of male biased replicates have divergent cuticular lipid  
37 profiles, isolation of male biased replicates as a result of cuticular lipid divergence cannot be  
38 credited to sexually antagonistic coevolution.

39

40 **Key Words** - Sexual conflict, sexual selection, reproductive isolation, *Drosophila*,  
41 cuticular hydrocarbon, random forest analysis.

42

## INTRODUCTION

43 Mathematical models of sexual conflict based on mating rate envisage six possible  
44 evolutionary outcomes out of which two lead to speciation: allopatric speciation as a  
45 byproduct of sexually antagonistic coevolution (SAC) and sympatric speciation as a  
46 byproduct of divergence in the reproductive traits of females followed by the male sex  
47 (Gavrilets and Hayashi 2005). A comparative study on groups of insect species has shown  
48 that the prevalence of high sexual conflict makes a taxonomic group more speciose than  
49 those with low or no sexual conflict (Arnqvist et al. 2000). However, the support for  
50 speciation through sexual conflict is not universal and comparative studies on other groups of  
51 species have not found a similar trend (Gage et al. 2002, Morrow et al. 2003). Experimental  
52 studies that directly investigate speciation linked to sexual conflict too are inconsistent in  
53 their support for the hypothesis presumably due to the occurrence of four other possible  
54 dynamic outcomes predicted in the mathematical models that do not result in speciation  
55 (Gavrilets 2014).

56 By evolving independent replicates of a dung fly population for 35 generations under  
57 monogamous (low) and polygamous (high) sexual conflict) regime, Martin and Hosken  
58 (2003) showed that mating success between individuals of the same population was  
59 significantly higher than that of pairs consisting of males and females from different  
60 populations under polygamous regime. In the monogamous regime, there was no difference  
61 in mating success between individuals from hetero-population and same population.  
62 Recently, a study on *Drosophila melanogaster* populations using male biased (high sexual  
63 conflict) and female biased (low sexual conflict) operational sex ratio regimes showed that  
64 evolution of both premating and post mating prezygotic isolation was possible within 105  
65 generations in the high sexual conflict regime but not in the low sexual conflict regime (Syed  
66 et al. 2017). Contrary to these two studies, few other studies were unable to find any support

67 for sexual conflict driven reproductive isolation leading us to question the potential of sexual  
68 conflict as an “engine of speciation” (Gage et al. 2002, Morrow et al. 2003, Bacigalupe et al.  
69 2007, Gay et al. 2009, Plesnar-Bielak et al. 2013).

70 Syed et al. (2017) indicate that the differences in mate preference among replicate male  
71 biased (3 male : 1 female sex ratio) *Drosophila melanogaster* populations arise due to  
72 sexually antagonistic coevolution. Prezygotic isolation by mate preference is often mediated  
73 by cuticular lipid profiles that provide information about species identity, sex, mating status,  
74 age, etc. to a receiver and play a pivotal role in sexual communication in *Drosophila* sp.  
75 (Ferveur et al. 1989, Ferveur 1997, Ferveur and Cobb 2010). It is, therefore, possible that the  
76 cuticular lipid profiles form the mechanistic basis for mate preference among replicate male  
77 biased populations in *D. melanogaster* studied by Syed et al. (2017). However, this  
78 possibility assumes that the cuticular lipid profiles have also differentiated among replicates  
79 as a byproduct of sexual conflict within each allopatric replicate. Cuticular lipid profiles of  
80 *Drosophila melanogaster* are dimorphic (Ferveur and Cobb 2010) and those cuticular lipids  
81 that take part in mate preference are known to have independent genetic controls in the two  
82 sexes, often linked to sex determination genes, for their biosynthesis (Ferveur 2005,  
83 Chenoweth et al. 2008, Dembeck et al. 2015). This is a possible signature of past sexually  
84 antagonistic selection (Cox and Calsbeek 2009) and current interlocus sexual conflict. Many  
85 previous studies have implicated differentiated cuticular lipid profiles in the evolution of  
86 reproductive isolation in *Drosophila* sp. through sexual selection (Smadja and Butlin 2008,  
87 Laturney 2012, Shahandeh et al. 2017) but in this study we look into the possibility of  
88 cuticular lipid divergence under differential sexual conflict.

89 We test the hypothesis that cuticular lipid profiles (that play a role in mate attraction) are  
90 differentiated in conjunction with the differentiation in mate preference by sexual conflict.

91 Using the same *D. melanogaster* populations as Syed et al. (2017), we investigate the patterns  
92 of cuticular lipid divergence among the replicates of male and female biased regimes. We  
93 expect all *D. melanogaster* populations to show sexual dimorphism in cuticular lipid profiles.  
94 We predict that due to high sexual conflict the male cuticular lipid profiles of male biased (3  
95 male : 1 female) replicates will diverge more than the male cuticular lipid profiles of the  
96 female biased (1 male : 3 female) populations. Our result suggests that reproductive isolation  
97 among M replicates due to high sexual conflict is not explained by the patterns of cuticular  
98 lipid divergence. Instead we find other evolutionary mechanisms that are contributing to  
99 cuticular lipid divergence.

100

101  
102  
103  
104  
105  
106  
107  
108  
109  
110  
111  
112  
113  
114  
115  
116  
117  
118  
119  
120  
121  
122  
123  
124

## METHODS AND MATERIALS

*D. melanogaster* population maintenance. In this study, we used nine populations of *Drosophila melanogaster* belonging to 168-170 generation raised under three different selection regimes. These three selection regimes were identical in all respect, except for the adult sex-ratio. The male biased regime (henceforth M) had a 1:3 :: female:male adult sex ratio, while the female biased regime (henceforth F) had a 3:1 :: female:male adult sex ratio. The control regime (henceforth C) had a 1:1 adult sex ratio. Each regime had three replicate populations (M1,2,3 in the M regime, F1,2,3 in the F regime and C1,2,3 in the C regime). All nine populations ultimately trace their ancestry to a large, laboratory adapted population, LHst which has an autosomal, recessive scarlet eye-colour marker. We first derived three populations from the LHst population and labeled them C1,2,3. The C1,2,3 populations were maintained at a 1:1 adult sex ratio for five generations. Subsequently, from each C population, we derived one population for the M regime, one for the F regime and one for the C regime. M, C and F populations with the same subscript were derived from the same C population and therefore are closely related in terms of ancestry. For example, M1, F1 and C1 were derived from C1. Moreover, during subsequent population maintenance, M, C and F populations with the same subscript are handled on the same day and therefore can be treated as statistical blocks. The details of maintenance of M, C and F populations have been described elsewhere(Nandy et al. 2013a). Briefly, these populations are maintained on a 14-day discrete generation cycle, at 25°C and 60% relative humidity (RH), 12:12 hours light/dark cycle and standard cornmeal– molasses–yeast food in standard vials (90-mm length × 30-mm diameter). In each regime, every generation we collect virgin males and females and combine them in appropriate sex ratios. Males and females interact for around 48 hours, after which they are transferred to fresh vials for oviposition. Eggs laid are trimmed to a

125 density of around 140-160 eggs per vial containing 6-8 ml food. These eggs are used to start  
126 the next generation.

127 *Generating flies for cuticular lipid extraction.* Before cuticular lipid extraction  
128 from virgin M, C, and F flies, we allowed one generation of “standardization” or common-  
129 garden rearing at a 1:1 sex ratio following Nandy et al. (2013a) to account for any potential  
130 non-genetic parental effect (Rose 1984). In order to generate flies for cuticular lipid  
131 extraction, we collected eggs from “standardised” flies. On the 10th day after egg collection  
132 from the M, C, and F populations, we collected newly eclosed flies as virgins within 6 hours  
133 of eclosion under light CO<sub>2</sub> anesthesia. The flies were isolated by keeping each of them  
134 singly in a vial for 2 days. On 12th day (ensuring flies of same age to minimize age-specific  
135 variation of cuticular lipids) the cuticular lipids extraction assay was conducted.

136 *Cuticular lipid extraction.* We transferred each virgin individual to a 1.5 ml gas  
137 chromatography (GC) vial without anesthetising it. We then poured a 200 µl Hexane solvent  
138 containing 10ng/µl Pentadecane (C<sub>15</sub>H<sub>32</sub>, internal standard) into the GC vials. The vials  
139 were left undisturbed for 4 minutes and then vortexed for 1 minute. We removed the dead  
140 individual from each GC vial and subsequently left the hexane to dry out. The extracted  
141 samples in the GC vials were then stored at 4°C until gas chromatography was performed.  
142 Cuticular lipids were extracted from the male and female *D. melanogaster* flies belonging to  
143 all blocks of MCF population [n for M = 119 (60 males + 59 females), n for F = 115 (58  
144 males + 57 females) and n for C = 118 (59 males + 59 females)].

145 *Gas chromatography.* Before gas chromatography, the dried extract adhering to the  
146 glass GC vials was brought to solution by pipetting 20 µl Hexane and vortexed for 30 sec.  
147 We injected 2µl of this solution manually into splitless Shimadzu GC-2010 Plus instrument

148 fitted with a Restek Rxi-5Sil MS (30m x 0.25 $\mu$ m df x 0.25mm ID) capillary column. The  
149 24.88 minutes' temperature program was set to increase from initial 57°C held for 1.1  
150 minutes to 190°C held for 1.2 minutes at 100°C per minute. The temperature increased from  
151 190°C to 270°C at 5°C per minute and finally raised to 300°C at 120°C per minute with hold  
152 time of 5 minutes at 300°C (Bedhomme et al. 2011). The carrier gas was Nitrogen with  
153 column flow rate fixed at 2ml per minute.

154 *Cuticular lipid identification.* Before gas chromatography of *D. melanogaster*  
155 samples, a chromatographic run was performed with a mix of known straight chained alkane  
156 standards (C<sub>10</sub> to C<sub>40</sub>) increasing in even numbers of Carbon. This chromatogram was used to  
157 measure Kovats Retention Index (KI) for all relevant unknown sample peaks by referring to  
158 retention time for internal standard (Pentadecane: C<sub>15</sub>) and hydrocarbon compounds in the  
159 standard mix. The KI was used to identify cuticular lipid peaks based on already published  
160 KIs of cuticular lipids (using similar method followed by Bedhomme et al. (2011)).

161 *Cuticular lipid quantification.* All peaks that consistently appeared in the samples  
162 when compared with a blank chromatographic run (using Hexane that was used in the  
163 extraction process) were considered relevant to this study. The area under the peak value was  
164 calculated by drawing a baseline to each relevant peak using the Shimadzu GCSolutions  
165 software. We manually checked the integrated peaks in all the sample chromatograms for any  
166 irregularities. The peak areas of the 352 samples was standardized by dividing the peak value  
167 with that of internal standard (Pentadecane) from respective chromatograms following  
168 Bedhomme et al. (2011). Each standardized value was then multiplied by 105 to enable us to  
169 use more significant figures in multivariate analysis. While standardization using internal  
170 standard allow us to minimise any handling effect during gas chromatography performed  
171 over many days, we further normalized the standardized peak values of all samples to reduce



172 any handling effect that may have cropped up during extraction process. Extractions were  
173 performed on three different days for three different blocks of M, C and F. This entire  
174 exercise was repeated at two different times. We use the following min-max feature scaling  
175 formula for normalizing cuticular lipid peak values:  $X_{new} = \frac{X - X_{min}}{X_{max} - X_{min}}$  where  $X_{new}$  is the  
176 normalized peak value,  $X$  is the actual peak value,  $X_{max}$  is the maximum peak value within a  
177 group and  $X_{min}$  is the minimum peak value within a group. However, we also ran Random  
178 Forest analysis (see below) with non-normalised data to examine whether any effect of  
179 procuring samples at different times affected the cuticular lipid divergence pattern. We find  
180 that cuticular lipid divergence pattern is qualitatively similar for both normalized and non-  
181 normalised data. We use divergence pattern from normalized data in this study while  
182 corresponding cuticular lipid divergence pattern from non-normalised data is presented as  
183 supplementary information (see Supplementary Information).

184 *Linear mixed effects analysis.* To quantify whether variables such as selection  
185 regimes, sex, replicates and their interactions explain the distribution of the peak values of  
186 each cuticular lipid, we used linear models for mixed effects analysis. Following Bedhomme  
187 et al. (2011), selection regime (M, C and F), sex (male and female) and their interaction were  
188 considered explanatory variables with fixed effects while replicates within each selection  
189 regimes (block 1, 2, and 3) and its interactions with explanatory variables were assigned as  
190 variables with random effects. Although each individual within blocks were unique, block  
191 themselves were nested within each selection regime. Additionally, the same subscript in  
192 block identity from different selection regime denoted common ancestry. A common ancestry  
193 has the possibility of confounding the independence of cuticular lipid profiles of the studied  
194 *Drosophila* individuals stochastically since these populations have evolved for around 170  
195 generations, making it necessary to consider block identity as random effect. Therefore, using

196 normalized peak values as response variables in this analysis, we modelled the fixed and  
197 random effects on the response variables according to the following two formula:

198 Model 1 = Selection regime + Sex + (Selection regime x Sex) + Block

199 Model 2 = Selection regime + Sex + (Selection regime x Sex) + Block + (Selection  
200 regime x Block) + (Block x Sex) + (Selection regime x Block x Sex)

201 While Model 1 represents a simpler model out of the two models containing all variables  
202 with fixed effects and only block identity having random effect, Model 2 incorporates all  
203 biologically relevant explanatory variables with fixed and random effects. We used “lme4”  
204 package in R and selected a model out of the two aforementioned models for each cuticular  
205 lipid that had a lower Akaike Information Criterion (AIC). Linear mixed effects analysis  
206 explains how different variables recorded during sampling from the *D. melanogaster*  
207 populations affect each cuticular lipid individually. However, to further understand how the  
208 combinations of all cuticular lipids determine grouping of *Drosophila* M, C and F  
209 populations, we used Random Forest based multivariate analysis.

210 *Random Forest analysis.* Multivariate analysis like principal component analysis and  
211 discriminant function analysis are generally used in studies that investigates group patterns  
212 within samples based on cuticular profiles (Kather and Martin 2012). However, these  
213 statistical techniques are adversely impacted by small sample-size(n):variables(p), non-  
214 independence of cuticular lipids in a sample (since many cuticular lipids share common  
215 biochemical pathways (Dembeck et al. 2015)) and disproportionate effects of cuticular lipids  
216 found in trace amounts (Martin and Drijfhout 2009). To overcome this drawbacks of  
217 traditional techniques, we used Random Forest analysis (R package “Party”) that performs  
218 well under “small n large p” conditions, unaffected by highly correlated variables and is

219 unbiased towards the nature of variables used (Strobl et al. 2009b, 2009a). Random Forest  
220 Analysis is a machine learning algorithm that forms numerous classification schemes without  
221 prior expectation of the data structure by repeated subsampling of the data and random  
222 selection of a few predictor variables (Strobl et al. 2009b). Using these classification schemes  
223 (also called base learners), individuals are reassigned their identity based on their probability  
224 to appear as a particular group in the base learners. When these new identities of the samples  
225 are compared to their already known group identity, we calculate the percentage correct  
226 prediction of individual identities from Random Forest analysis. Based on the probabilities of  
227 individual identities, proximity analysis (identical to similarity-dissimilarity matrix/  
228 correlation matrix in traditional multivariate analysis) gives us a measure of samples' group  
229 affinity. Multidimensional scaling (identical to Principal Component Analysis) of the  
230 proximity matrix is then illustrated in a scatterplot to show how experimental individuals  
231 group with respect to each other.

232 We performed Random Forest analysis using normalized and standardised area under the  
233 peak values of all relevant peaks. Seed (a random number) was set to 1220. We checked the  
234 stability of the classification scheme by increasing the number of subsampling events  
235 gradually from 5000 to 20000 and decided to set the number of trees (ntree) parameter in the  
236 analysis at 15000. The number of variables (mtry = 6) to be used in the analysis was fixed to  
237 rounded square root of the number of predictor variables (in the present study, the number of  
238 peaks analysed in chromatograms) in the data (Strobl et al. 2009b). Multi-dimensional  
239 scaling (MDS) of proximity matrix was used to produce two dimensional scatterplots  
240 showing clustering of individuals.

241  
242  
243  
244  
245  
246  
247  
248  
249  
250  
251  
252  
253  
254  
255  
256  
257  
258  
259  
260  
261  
262  
263  
264

## RESULTS

*Characterisation of cuticular lipids in D. melanogaster populations under differential sexual conflict.* We found a total of 44 peaks that consistently appeared in MCF chromatograms. Out of the 44 peaks, 37 were cuticular hydrocarbons (CHCs), 3 belonged to other chemical groups found on insect cuticle and 4 could not be identified. We also found 14 new peaks that have not been reported for *Drosophila melanogaster* in literature before. Most of the CHCs had hydrocarbons chain lengths between C<sub>20</sub> and C<sub>30</sub> (see Supplementary Information). Male and female chromatographic profiles significantly differed in relative abundance of 35 peaks out of the 44 identified peaks based on Welch two sample *T test* ( $p < 0.05$ ). The 9 cuticular lipids which occur in similar quantities in both males and females are most likely involved in primary anti-desiccation function of cuticular lipids. *Drosophila melanogaster* males predominantly produce monoenes (e.g. Tricosene, Pentacosene, etc) while their females predominantly produce dienes (e.g. Heptacosadiene, Nonacosadiene, etc.) (Ferveur and Cobb 2010). Among the dimorphic cuticular lipids (see Supplementary Information), we found that the *D. melanogaster* males produced few monoenes (peak 7, 8, 15, 16, 19 and 43) significantly more than the females. Peak 19 (a Pentacosene isomer) that is always present in males was totally absent in females indicating a likely sex specific role. However, we also found certain monoenes (peak 20, 21, 25, 26, 27, 28 and 30) to be significantly more in the females than males. The *D. melanogaster* females almost always produced significantly more dienes (peak 22, 23, 31, 32, 33, 34 and 41) than the males in our study (only exception being peak 14/ (Z,Z)-7,11-Tricosadiene). In our *D. melanogaster* populations, Peak 33 (9,13-Heptacosadiene) was generally absent from male chromatograms but were found in most females. Apart from Peak 19 and Peak 33, all other peaks appeared consistently in all female samples while except Peak 33 and Peak 39 (14-

265 Methyloctacosane), all peaks appeared consistently in all male chromatograms (see  
266 Supplementary Information).

267 *Effects of selection regime, sex and replicate on the cuticular lipids of D.*

268 *melanogaster* populations under differential sexual conflict. We considered 37

269 peaks out of 44 cuticular lipids for the linear mixed effects analysis. Peak 15, 25-29 and 42

270 were ambiguous since they often appeared as more than one peak within their retention time

271 in many samples. We assigned Model 1 for most cuticular lipids while 6 cuticular lipids were

272 assigned Model 2 as the best fit model based on the lower AIC value. Even in case of these 6

273 cuticular lipids, Model 2 outperformed Model 1 on a thin difference of AIC varying between

274 0.008-4.38 (exception being Peak 36: difference in AIC between Model 1 and Model 2 was

275 28.52). This indicates that variables with random effects played an insignificant role in

276 influencing the cuticular lipid profiles of *D. melanogaster* M, C and F populations. When we

277 compared the standard deviation of variable(s) with random effects to that of the residual for

278 each peak (that were in itself close to 0 in all cases), we found that the standard deviation of

279 residual was always more (in many cases, order of magnitude more) than the standard

280 deviation of variable(s) with random effects for all peaks under consideration (see

281 Supplementary Information for detailed results). This means block or its interactions are not

282 substantial than other unaccounted random effects and confirms that there is no effect of

283 common ancestry of the replicates of the selection lines on the cuticular lipid profiles of the

284 M, C and F populations. The sex of the sampled *D. melanogaster* individuals is the most

285 important variable affecting the cuticular lipid profiles of the M, C and F populations (see

286 Table 1) as is seen in the *T test* (see Supplementary Information). The variables with fixed

287 effects such as selection regime and its interaction with sex of the individuals also affect a

288 few cuticular lipids (see Table 1). Only two cuticular lipids (Peak 2 and Peak 10) are not

289 affected by any of the explanatory variables. Since this test failed to give us any indication

290 whether replicates of M were more diverged in terms of cuticular lipids than that of the F  
 291 populations, we subsequent performed multivariate analysis to investigate whether cuticular  
 292 lipid bouquet resulted in grouping among M populations compared to that of the F  
 293 populations.

| Peak ID | Selected model | Selection regime  | Sex               | Selection regime x Sex | Block     |
|---------|----------------|-------------------|-------------------|------------------------|-----------|
| Peak 1  | Model 1        | No effect         | No effect         | p = 0.04237 *          | No effect |
| Peak 2  | Model 1        | No effect         | No effect         | No effect              | No effect |
| Peak 3  | Model 1        | p = 0.03458 *     | p < 2e-16 ***     | No effect              | No effect |
| Peak 4  | Model 1        | No effect         | p < 2e-16 ***     | No effect              | No effect |
| Peak 5  | Model 1        | No effect         | No effect         | p = 0.01148 *          | No effect |
| Peak 6  | Model 1        | No effect         | No effect         | p = 0.004846 **        | No effect |
| Peak 7  | Model 1        | No effect         | p < 2e-16 ***     | No effect              | No effect |
| Peak 8  | Model 1        | No effect         | p < 2e-16 ***     | No effect              | No effect |
| Peak 9  | Model 1        | No effect         | p < 2e-16 ***     | No effect              | No effect |
| Peak 10 | Model 2        | No effect         | No effect         | No effect              | No effect |
| Peak 11 | Model 1        | No effect         | p < 2e-16 ***     | No effect              | No effect |
| Peak 12 | Model 1        | No effect         | p < 2e-16 ***     | No effect              | No effect |
| Peak 13 | Model 1        | No effect         | p < 2e-16 ***     | No effect              | No effect |
| Peak 14 | Model 1        | No effect         | p < 2e-16 ***     | No effect              | No effect |
| Peak 16 | Model 1        | No effect         | p < 2e-16 ***     | No effect              | No effect |
| Peak 17 | Model 2        | No effect         | p = 2.285e-08 *** | No effect              | No effect |
| Peak 18 | Model 1        | No effect         | p < 2e-16 ***     | No effect              | No effect |
| Peak 19 | Model 1        | No effect         | p < 2e-16 ***     | No effect              | No effect |
| Peak 20 | Model 1        | No effect         | p < 2e-16 ***     | No effect              | No effect |
| Peak 21 | Model 1        | No effect         | p < 2e-16 ***     | No effect              | No effect |
| Peak 22 | Model 1        | No effect         | p < 2e-16 ***     | No effect              | No effect |
| Peak 23 | Model 1        | No effect         | p < 2e-16 ***     | No effect              | No effect |
| Peak 24 | Model 1        | p = 0.004373 **   | No effect         | p = 0.007562 **        | No effect |
| Peak 30 | Model 2        | No effect         | p < 2e-16 ***     | p = 0.008085 **        | No effect |
| Peak 31 | Model 1        | No effect         | p < 2e-16 ***     | No effect              | No effect |
| Peak 32 | Model 1        | No effect         | p < 2e-16 ***     | No effect              | No effect |
| Peak 33 | Model 1        | No effect         | p < 2e-16 ***     | No effect              | No effect |
| Peak 34 | Model 1        | p = 0.01104 *     | p < 2e-16 ***     | p = 0.02210 *          | No effect |
| Peak 35 | Model 1        | No effect         | p = 0.03364 *     | No effect              | No effect |
| Peak 36 | Model 2        | No effect         | p = 2.745e-06 *** | No effect              | No effect |
| Peak 37 | Model 1        | No effect         | No effect         | p = 0.003142 **        | No effect |
| Peak 38 | Model 2        | p = 0.0007705 *** | p = 0.0093053 **  | No effect              | No effect |
| Peak 39 | Model 2        | No effect         | p < 2e-16 ***     | No effect              | No effect |
| Peak 40 | Model 1        | No effect         | p < 2e-16 ***     | No effect              | No effect |
| Peak_41 | Model 1        | p = 0.043603 *    | p < 2e-16 ***     | p = 0.009622 **        | No effect |

|         |         |               |               |                |           |
|---------|---------|---------------|---------------|----------------|-----------|
| Peak_43 | Model 1 | p = 0.01067 * | p < 2e-16 *** | No effect      | No effect |
| Peak_44 | Model 1 | No effect     | p < 2e-16 *** | p = 0.00130 ** | No effect |

294 Table 1: Influence of variables with fixed effects (selection line, sex and their interactions) and  
295 random effects (block and its interaction with other variables) on 37 cuticular lipids of  
296 *Drosophila* M-C-F populations under linear mixed effect modelling framework. Model with  
297 lower AIC was selected for each cuticular lipid. Those variables with statistically significant  
298 effect have been assigned a p-value (p) based on *Type II Wald chi-square* tests on variables  
299 with fixed effects. Effect of replicates from selection regime (block) was assessed by  
300 comparing the standard deviation of block with that of the residual random effects (see  
301 Supplementary Information). We also performed *MANOVA* with *Pillai's test* on the 37  
302 cuticular lipid peaks that showed all peaks individually as well as together contributes  
303 significantly (Pillai statistic = 5.67, F (646, 5321) = 4.12, p < 0.0001) to differences between  
304 the sexes and among the blocks of all 3 *Drosophila* selection regime (M, C and F) (see  
305 Supplementary Information).

306 *Divergence patterns of cuticular lipids in D. melanogaster populations*  
307 *under differential sexual conflict.* We used the same 37 cuticular lipids from linear  
308 mixed effects analysis for multivariate analysis using Random Forest. As indicated in the  
309 table from Supplementary Information, MDS of proximity matrix showed sexes formed  
310 distinct groups in *D. melanogaster* M, C and F populations with 100 % correct sex  
311 identification in random forest analysis. In C population, Random Forest analysis produced  
312 98.3% correct prediction of individuals belonging to 3 different replicates. It is important to  
313 note that the triplicates of C are maintained at unit sex ratio and are derived from LH<sub>st</sub> while  
314 M and F populations are derived from the C replicates (see Methods section for details).  
315 Therefore, the divergence pattern of C in Fig. 1 (see Supplementary Information for 3D  
316 representation) can be considered as the ancestral pattern and is subsequently used as

317 reference pattern to M and F populations. The cuticular lipid divergence pattern in Fig. 2 (see  
318 Supplementary Information for 3D representation) suggests that the M females are more  
319 dispersed than the M males that are tightly grouped (95 % correct identification of M  
320 individuals from 3 replicate populations). In comparison to C population, M males appear to  
321 have evolved cuticular lipid profiles which are more similar to each other while M females  
322 have either evolved a more variable cuticular lipid profile or maintained their cuticular lipid  
323 profile variability as seen in C females. In F population (Fig. 3 (see Supplementary  
324 Information for 3D representation)), we see an opposite trend where the F males are  
325 dispersed more than the F females that form tight group (93 % correct identification of F  
326 individuals belonging to 3 replicate populations). Comparison with C females suggests that F  
327 females have evolved identical cuticular lipid profiles while F males have either increased or  
328 maintained their variable cuticular lipid profile as seen in C males. Corresponding 3-  
329 dimensional scatterplot representations for Fig. 1, Fig. 2 and Fig. 3 are provided in the  
330 supplementary information.

331 Fig. 1 About here.

332 Fig. 2 About here.

333 Fig. 3 About here.

334 When we compare male cuticular lipid profile of M and F replicates, Random Forest analysis  
335 predicted 89% correct identification of the  $M_{1,2,3}$  and  $F_{1,2,3}$  males (see Fig. 4). In Fig. 4, males  
336 of M replicates formed separate groups with few overlaps among themselves. However, F  
337 replicates did not group separately from the M replicates as expected but overlapped with  
338 corresponding M replicates. In Random Forest analysis involving females of M and F  
339 replicates, we could identify  $M_{1,2,3}$  and  $F_{1,2,3}$  females with 87.1% correct prediction (see Fig.



340 5). Fig. 5 revealed that M females from different replicates formed separate groups with few  
341 overlaps. We again find a considerable overlap of F replicates on corresponding M replicates.

342 Fig. 4 About here.

343 Fig. 5 About here.

344

345

## DISCUSSION

346 Divergent reproductive behavior in high sexual conflict regimes of allopatric MCF populations  
347 evolved over 105 generations as a byproduct of sexually antagonistic coevolution within each  
348 M replicates (Syed et al. 2017). Since reproductive behavior did not diverge in F replicates  
349 under low sexual conflict, we predicted that male and female cuticular lipid profiles of the three  
350 replicates within the M regime should be more divergent from each other compared to the  
351 differences in the cuticular lipid profiles of the three replicates within the F regime (assuming  
352 the putative chemical cues such as the cuticular lipids form the basis of divergent mate choice  
353 in M). Random Forest analysis (see Fig. 4) shows that the three replicates of M males form 3  
354 distinct groups but contrary to our prediction, F males do not form a single group. Instead, the  
355 three F replicates overlap with the three corresponding M replicates. The same divergence  
356 pattern is also reflected in the females of M and F replicates (see Fig. 5). Such cuticular lipid  
357 divergence pattern indicates that sexual conflict has little or no role in reproductive isolation  
358 via male cuticular lipid differentiation within M and F regimes that have been under high and  
359 low sexual conflict, respectively, for around 170 generations at the time of this study. Rather  
360 the cuticular lipid divergence in M and F regime appears to follow an inexplicable pattern.  
361 There are two possible reasons for the block-wise cuticular lipid divergence pattern that we see  
362 in the replicates of M and F sexes. The cuticular lipid divergence pattern of M and F males and  
363 females (Fig. 4 and Fig. 5) may be construed as a result of handling effect since extraction  
364 process spanned over three days (for three blocks) and repeated at two different times (see  
365 Methods section for details). Using Random Forest analysis on normalized and non-normalised  
366 data, we tried to address this issue. However, congruence in cuticular lipid divergence patterns  
367 from these two treatments of cuticular lipid peak values (see Supplementary Information for  
368 cuticular lipid divergence pattern using non-normalised dataset) indicate that there was no  
369 significant effect of handling during the extraction process done over three days at two different

370 times. Ferveur and Cobb (2010) suggest that the variability in the cuticular lipid profiles of  
371 different populations under different selection pressure (as is observed in this study) is possibly  
372 due to different initial and undergoing evolutionary mechanism. Alternatively, the divergence  
373 pattern of M and F males and females (Fig. 4 and Fig. 5) could be a result of ancestry. However,  
374 since M, C and F populations were established using a large population size ( $N_e$  (LH<sub>st</sub>) ~ 2250,  
375  $N_e$  (MCF) ~ 450; (Nandy et al. 2013b)), a founder effect during initial establishment is unlikely  
376 to affect the MCF populations. This is also confirmed in the linear mixed modelling analysis  
377 which shows effect of replicates on the cuticular lipid profile is negligible, if any in many cases  
378 (see Table 1). In conclusion, reproductive isolation (in M regime but not in F regime (Syed et  
379 al. 2017)) as a byproduct of sexually antagonistic coevolution cannot be explained by the  
380 cuticular lipid divergence among males and females of *Drosophila melanogaster* M and F  
381 regimes when analysed separately. However, cuticular lipid divergence in M and F at regime  
382 level indicate other possible evolutionary mechanisms at play that are discussed below.

383 Isolation among M replicates in form of diverged mate preference could possibly be maintained  
384 by sexual selection acting on mating signals (Syed et al. 2017). Since cuticular lipid profiles of  
385 *D. melanogaster* MCF populations are dimorphic, one possible mechanism for this  
386 reproductive isolation among M replicates could be mate choice over the divergent cuticular  
387 lipid profiles. In this study, sexual selection appears to have particularly strong effect on the  
388 cuticular lipid profiles in a different way at the regime level (see Fig. 1, Fig. 2 and Fig. 3). If  
389 we compare the cuticular lipid profiles of males and females of C regime and M regime, we  
390 see that M females have diverged with respect to C females while M males have converged  
391 with respect to C males considerably. This pattern indicates that under increased sexual  
392 selection, M males are pushed towards a common optimum point in terms of cuticular lipid  
393 profile in order to present a more preferable cuticular lipid profile to M females. Similar  
394 cuticular lipid profiles of the M males may also be explained by suppression of sexually

395 selected cuticular lipids such that variability of male cuticular lipid is reduced over time. This  
396 may be true since *D. serrata* males have been found to lower their cuticular lipid expression  
397 when female : male ratio is decreased (Gershman and Rundle 2017). The female cuticular lipid  
398 divergence of M could either be a result of maintaining ancestral pattern as seen in C or have  
399 diverged as predicted in populations following Buridan's ass regime (see below). On the  
400 contrary, F males and F females show a diametrically opposite pattern to that of the M regime.  
401 Under low sexual selection, the selection pressure is possibly weaker and hence, F males  
402 diversified and/or maintain their cuticular lipid variation as seen in the C regime. *Drosophila*  
403 *serrata* males exhibit cuticular lipid profile associated with increased mating success when  
404 female : male ratio is increased (Gershman and Rundle 2017). In F regime where female : male  
405 is high, males may evolve to display their most attractive cuticular lipids to potentially improve  
406 mating success leading to varied cuticular lipid profiles in the process. The F females appear  
407 to be more tightly grouped in terms of their cuticular lipid profile (in comparison to M females)  
408 than C population. This indicates that F females are probably under selection pressure to  
409 maintain similarity of their cuticular lipid profiles. The reason for this is not obvious and may  
410 be a result of correlated evolution in some other trait affected by sexual selection. Alternatively,  
411 F females may also be affected by high sexual selection (increased competition) due to altered  
412 sex ratio where they have to maintain identical profile to be acceptable to males that are fewer  
413 in number. Overall the cuticular lipid divergence pattern of M and F regime appears to be  
414 strongly influenced by sexual selection although other possible sexual conflict resolution  
415 mechanism such as Buridan's ass paradigm (see below) cannot be ruled out.

416 Apart from speciation, a population under sexual conflict may follow other evolutionary stable  
417 strategy to resolve the conflict between sexes (Gavrilets 2014). For example, in a large  
418 population and/or population with significant rates of mutations, there might be diversification  
419 of female traits with respect to male traits (Buridan's ass regime) such that males, in an attempt

420 to adapt to the variability in such traits, are caught in limbo unable to increase its own fitness  
421 in the population as a whole (Gavrilets and Hayashi 2005). This is relevant to the results from  
422 the current study where multivariate analysis show M females are more dispersed and M males  
423 form a tight group with respect to their cuticular lipid profile (see Fig. 2). It is known that the  
424 male mating behavior of *Drosophila melanogaster* is partially mediated by female cuticular  
425 lipids (Ferveur and Cobb 2010). The M population also meet the criterion for Buridan's ass  
426 regime since the population size is large ( $N_e \sim 450$ ) and the block-wise differences among M  
427 replicates (see Fig. 4) suggest that possibility of random mutation accumulation over several  
428 generations due to allopatry. It is therefore possible that sexual conflict on cuticular lipid trait  
429 in M regime has followed Buridan's ass phenomenon where M males have been caught in an  
430 uncertain intermediate stage failing to pursue either ends of cuticular lipid divergence in M  
431 females. The fact that this pattern is repeated in case of females of F regime is a revelation  
432 since effect of sexual conflict has been traditionally focused on males rather than females  
433 (Ferveur and Cobb 2010).

## 434 CONCLUSION

435 Experimental studies and comparative analysis of taxonomic groups suggest that speciation is  
436 possible under sexual conflict. The mathematical models support this possibility but also  
437 suggest that dynamics of evolution under sexual conflict is quite varied and stochastic to a  
438 point that evolution of reproductive isolation in allopatry is only one of the several other  
439 outcomes. This study is an example of different reproductive traits being affected differently  
440 by sexual conflict such that isolation based on mate preference, copulation duration and sperm  
441 defense ability is not reflected in the mate attraction cues such as cuticular lipids. Rather sexual  
442 conflict, if any, is probably reconciled in form of Buridan's ass regime. In fact, *D. melanogaster*  
443 individuals from high and low sexual conflict regime appear to be significantly affected by

444 sexual selection on cuticular lipid profiles. We conclude that since cuticular lipids form a basis  
445 for mate recognition, M males under high sexual selection tend to keep their cuticular lipid  
446 profiles similar to be acceptable by the limited number of females in the male biased regime.  
447 The same may also be true for the females of female biased regimes or their cuticular lipid  
448 divergence pattern may be by-product of sexual selection pressure on any other hitherto  
449 unknown trait.

450

451

## REFERENCES

452 Arnqvist, G., Edvardsson, M., Friberg, U., and Nilsson, T. 2000. Sexual conflict promotes  
453 speciation in insects. *Proc Natl Acad Sci USA* 97:10460. 1 pp.

454 Bacigalupe, L. D., Crudgington, H. S., HUNTER, F., Moore, A. J., and Snook, R. R.  
455 2007. Sexual conflict does not drive reproductive isolation in experimental populations of  
456 *Drosophila pseudoobscura*. *J Evol Biol* 20:1763–1771. 9 pp.

457 Bedhomme, S., Chippindale, A. K., Prasad, N. G., Delcourt, M., Abbott, J. K., Mallet, M.  
458 A., and Rundle, H. D. 2011. Male-limited evolution suggests no extant intralocus sexual  
459 conflict over the sexually dimorphic cuticular hydrocarbons of *Drosophila melanogaster*. *J*  
460 *Genet* 90:443. 1 pp.

461 Chenoweth, S. F., Rundle, H. D., and Blows, M. W. 2008. Genetic constraints and the  
462 evolution of display trait sexual dimorphism by natural and sexual selection. *The American*  
463 *Naturalist* 171:22–34. 13 pp.

464 Cox, R. M., and Calsbeek, R. 2009. Sexually antagonistic selection, sexual dimorphism,  
465 and the resolution of intralocus sexual conflict. *The American Naturalist* 173:176–187. 12 pp.

466 Dembeck, L. M., Böröczky, K., Huang, W., and Schal, C. 2015. Genetic architecture of  
467 natural variation in cuticular hydrocarbon composition in *Drosophila melanogaster*. *eLife*. 1  
468 pp.

469 Ferveur, J.-F. 1997. The pheromonal role of cuticular hydrocarbons in *Drosophila*  
470 *melanogaster*. *Bioessays* 19:353. 1 pp.

471 Ferveur, J.-F. 2005. Cuticular hydrocarbons: their evolution and roles in *Drosophila*  
472 pheromonal communication. *Behav Genet* 35:279–295. 17 pp.

- 473 Ferveur, J.-F., Cobb, M., and Jallon, J.-M. 1989. Complex Chemical Messages in  
474 *Drosophila*, pp. 397–409, in (eds.). *Neurobiology of Sensory Systems*. Springer US, Boston,  
475 MA. 13 pp.
- 476 Ferveur, J.-F., and Cobb, M. 2010. Behavioral and evolutionary roles of cuticular  
477 hydrocarbons in Diptera, pp. 325–343, in G. J. Blomquist and A. G. Bagnères (eds.). *Insect*  
478 *Hydrocarbons*. Cambridge University Press, Cambridge. 19 pp.
- 479 Gage, M. J. G., Parker, G. A., Nylin, S., and Wiklund, C. 2002. Sexual selection and  
480 speciation in mammals, butterflies and spiders. *Proc R Soc Lond [Biol]* 269:2309–2316. 8 pp.
- 481 Gavrilets, S. 2014. Is sexual conflict an "engine of speciation"? *Cold Spring Harb*  
482 *Perspect Biol* 6:a017723–a017723. 1 pp.
- 483 Gavrilets, S., and Hayashi, T. I. 2005. Speciation and sexual conflict. *Evol Ecol* 19:167–  
484 198. 32 pp.
- 485 Gay, L., Eady, P. E., Vasudev, R., Hosken, D. J., and Tregenza, T. 2009. Does  
486 reproductive isolation evolve faster in larger populations via sexually antagonistic  
487 coevolution? *Biology Letters* 5:693–696. 4 pp.
- 488 Gershman, S. N., and Rundle, H. D. 2017. Crowd control: sex ratio affects sexually  
489 selected cuticular hydrocarbons in male *Drosophila serrata*. *J Evol Biol* 30:583–590. 8 pp.
- 490 Kather, R., and Martin, S. J. 2012. Cuticular hydrocarbon profiles as a taxonomic tool:  
491 advantages, limitations and technical aspects. *Physiol Entomol* 37:25–32. 8 pp.
- 492 Laturney, M. 2012. The genetic basis of female mate preference and species isolation in  
493 *Drosophila*. *International Journal of Evolutionary Biology* 2012:1–13. 13 pp.



- 494 Martin, O. Y., and Hosken, D. J. 2003. The evolution of reproductive isolation through  
495 sexual conflict. *Nature* 423:979–982. 4 pp.
- 496 Martin, S. J., and Drijfhout, F. P. 2009. How reliable is the analysis of complex cuticular  
497 hydrocarbon profiles by multivariate statistical methods? *J Chem Ecol* 35:375–382. Springer-  
498 Verlag. 8 pp.
- 499 Morrow, E. H., Pitcher, T. E., and Arnqvist, G. 2003. No evidence that sexual selection is  
500 an ‘engine of speciation’ in birds. *Ecol Lett* 6:228–234. 7 pp.
- 501 Nandy, B., Gupta, V., Sen, S., Udaykumar, N., Samant, M. A., Ali, S. Z., and Prasad, N.  
502 G. 2013a. Evolution of mate-harm, longevity and behaviour in male fruit flies subjected to  
503 different levels of interlocus conflict. *BMC Evol Biol* 13:1–1. BMC Evolutionary Biology. 1  
504 pp.
- 505 Nandy, B., Gupta, V., Udaykumar, N., Samant, M. A., Sen, S., and Prasad, N. G. 2013b.  
506 Experimental evolution of female traits under different levels of intersexual conflict in  
507 *Drosophila melanogaster*. *Evolution* 68:412–425. 14 pp.
- 508 Plesnar-Bielak, A., Skrzynecka, A. M., Prokop, Z. M., Kolasa, M., Działo, M., and  
509 Radwan, J. 2013. No evidence for reproductive isolation through sexual conflict in the bulb  
510 mite *Rhizoglyphus robini*. *PLoS ONE* 8:e74971–9. 9 pp.
- 511 Rose, M. R. 1984. Laboratory evolution of postponed senescence in *Drosophila*  
512 *melanogaster*. *Evolution* 38:1004. 1 pp.
- 513 Shahandeh, M. P., Pischedda, A., and Turner, T. L. 2017. Male mate choice via cuticular  
514 hydrocarbon pheromones drives reproductive isolation between *Drosophila* species.  
515 *Evolution* 72:123–135. 13 pp.

516 Smadja, C., and Butlin, R. K. 2008. On the scent of speciation: the chemosensory system  
517 and its role in premating isolation. *Heredity* 102:77–97. 21 pp.

518 Strobl, C., Hothorn, T., and Zeileis, A. 2009a. Party on! A new, conditional variable  
519 importance measure for random forests available in the party package, pp. 1–5. Ludwig-  
520 Maximilians-Universität München. 5 pp.

521 Strobl, C., Malley, J., and Tutz, G. 2009b. An introduction to recursive partitioning:  
522 rationale, application, and characteristics of classification and regression trees, bagging, and  
523 random forests. *Psychol Methods* 14:323–348. 26 pp.

524 Syed, Z. A., Chatterjee, M., Samant, M. A., and Prasad, N. G. 2017. Reproductive isolation  
525 through experimental manipulation of sexually antagonistic coevolution in *Drosophila*  
526 *melanogaster*. *Sci Rep* 7:787–8. Springer US. 2 pp.

527

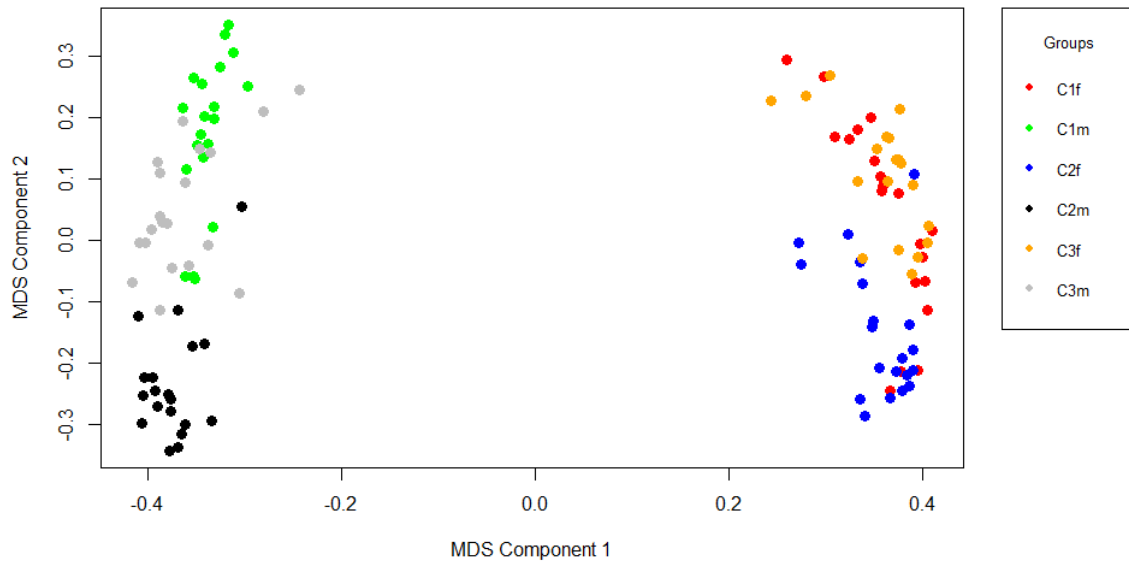

528

529 Fig. 1 Multi-dimensional scaling (MDS) of the proximity matrix of C individuals ( $C_{1/2/3}$  are C

530 blocks, m= males and f= females)

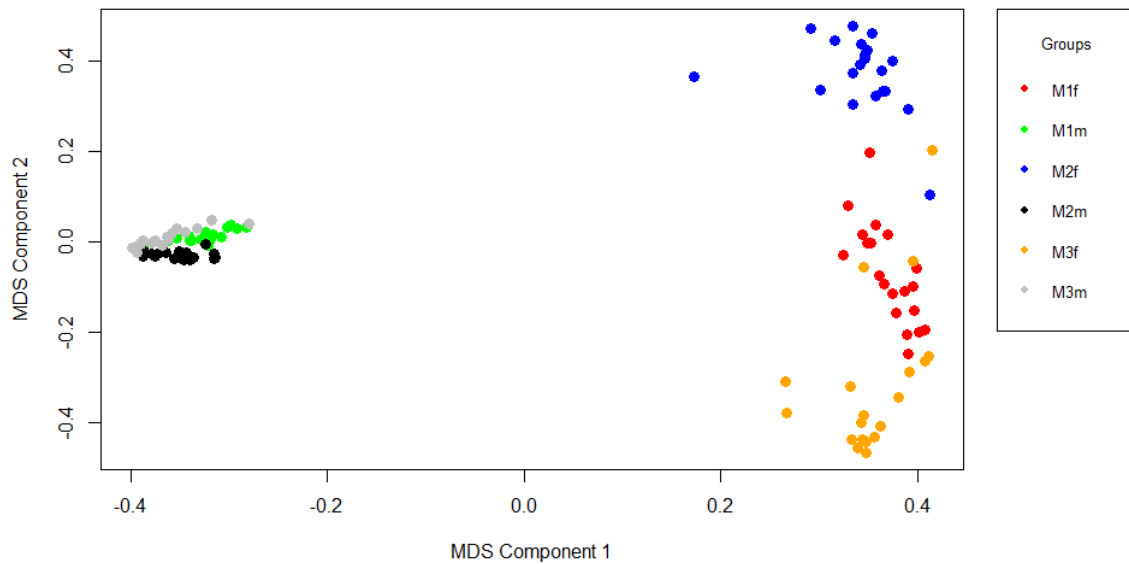

531

532 Fig. 2 Multi-dimensional scaling (MDS) of the proximity matrix of M individuals ( $M_{1/2/3}$  are

533 M blocks, m= males and f= females)

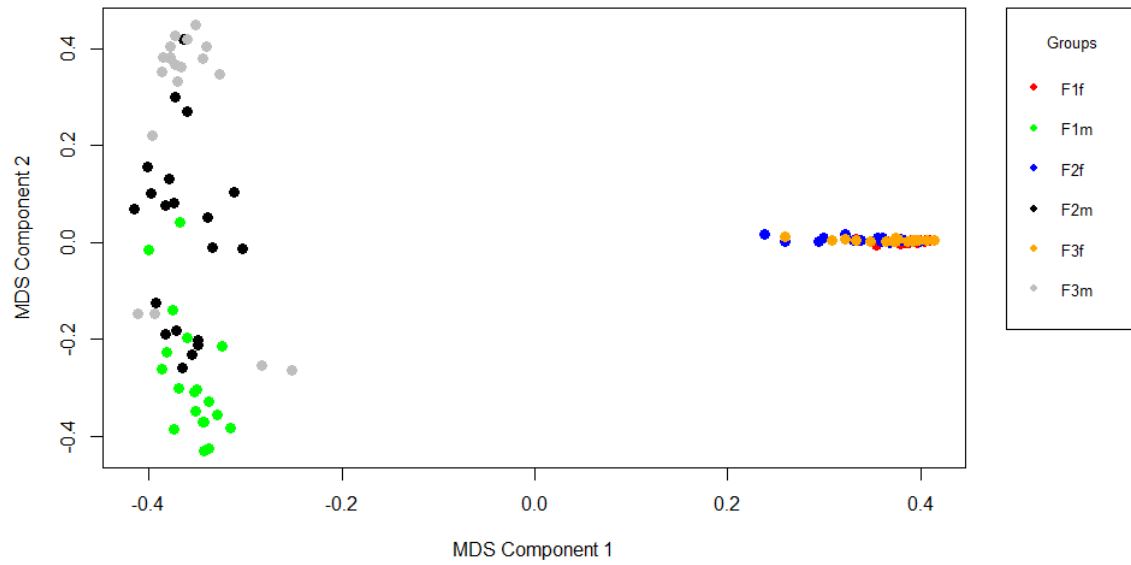

534

535 Fig. 3 Multi-dimensional scaling (MDS) of the proximity matrix of F individuals (F<sub>1/2/3</sub> are F

536 blocks, m= males and f= females)

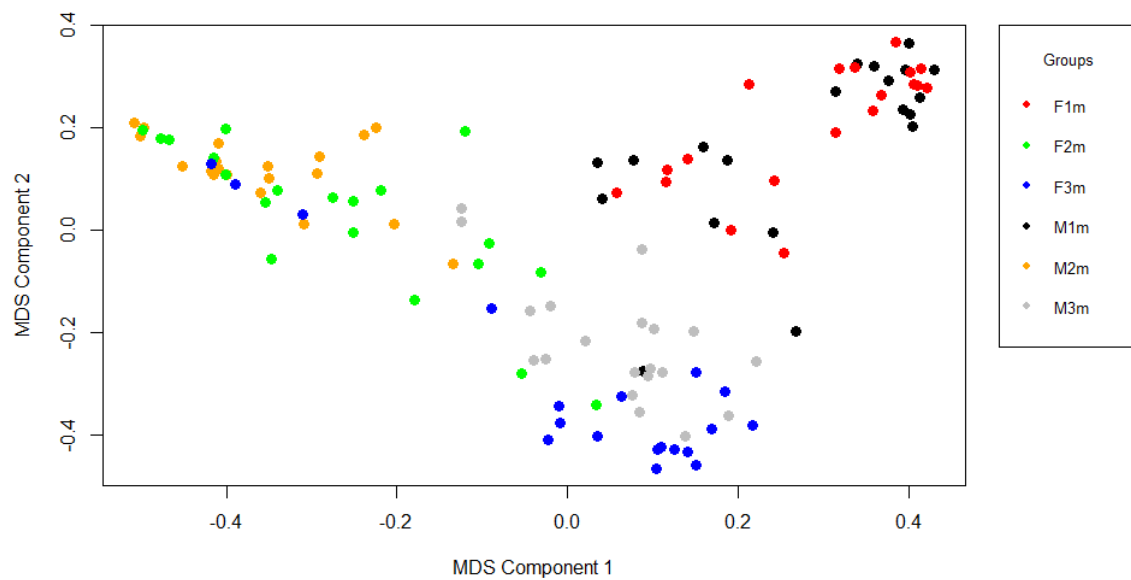

537

538 Fig. 4 MDS of proximity matrix derived from Random Forest analysis of males from three M

539 and F replicates

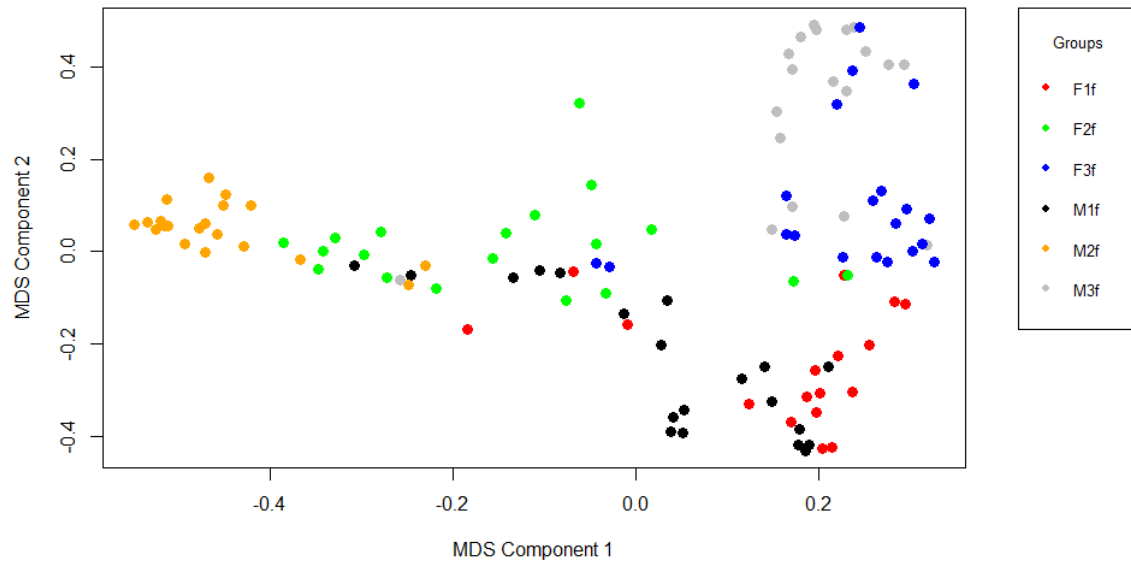

540

541 Fig. 5 MDS of proximity matrix derived from Random Forest analysis of females from three

542 M and F replicates

543
